# Supplementary material for: Use of Insulin and Insulin Analogs and Risk of Cancer — Systematic Review and Meta-Analysis of Observational Studies
Source: PubMed Central journal article supplement — Curr Drug Saf. 2014 Jan;8(1):333–48. doi: 10.2174/15680266113136660067 (PMC3899599; doi:10.2174/15680266113136660067), 2014-01
Supplement: CDS-8-333_SD1.pdf [file CDS-8-333_SD1.pdf]

## SUPPLEMENTARY MATERIAL

### Review and Meta-Analysis of Observational Studies

Øystein Karlstad<sup>1</sup>, Jacob Starup-Linde<sup>2,3</sup>, Peter Vestergaard<sup>3,4</sup>, Vidar Hjellvik<sup>1</sup>, Marloes T. Bazelier<sup>5</sup>, Marjanka K. Schmidt<sup>6</sup>, Morten Andersen<sup>7</sup>, Anssi Auvinen<sup>8</sup>, Jari Haukka<sup>9</sup>, Kari Furu<sup>1</sup>, Frank de Vries<sup>5,10</sup> and Marie L de Bruin<sup>5</sup>

<sup>1</sup>Department of Pharmacoepidemiology, Norwegian Institute of Public Health, Oslo, Norway

<sup>2</sup>Department of Endocrinology and Internal Medicine, Aarhus University Hospital, Denmark

<sup>3</sup>Clinical Institute, Aalborg University, Denmark

<sup>4</sup>Department of Endocrinology, Aalborg University Hospital, Denmark

<sup>5</sup>Division of Pharmacoepidemiology and Clinical Pharmacology, Utrecht Institute for Pharmaceutical Sciences, Utrecht University, the Netherlands

<sup>6</sup>Department of Molecular Pathology, Netherlands Cancer Institute, the Netherlands

<sup>7</sup>Centre for Pharmacoepidemiology, Karolinska Institute, Stockholm, Sweden

<sup>8</sup>School of Health Sciences, University of Tampere, Finland

<sup>9</sup>University of Helsinki, Finland

<sup>10</sup>Department of Clinical Pharmacy and Toxicology, Maastricht University Medical Centre, Maastricht, the Netherlands

### Supplementary Material 1: Search Strategy

Five databases were searched: Medline (PubMed), Embase (Ovid), Scopus (SciVerse), Web of Science WoS (ISI Web of Knowledge, Thomson Reuters) and the Cochrane Library (Wiley). All searches were performed on 27 November 2012 without restrictions on language, publication date, or publication status. MESH and Emtree terms were used (PubMed, Embase, Cochrane Library) with search filter “Humans” (Medline, Embase). In addition, free text search limited to records published during the last year was used to identify records not yet indexed with MESH and Emtree terms. For Scopus and Web of Science, only free-text searches were used. Search terms for diabetes, insulin and cancer (or similar terms) were used in all searches, while terms for risk or incidence were added in free text searches. The specific search strategy for each database is presented below.

#### Medline (PubMed)

##### MESH search combined with free text search and filter:

1. "Diabetes Mellitus"[Mesh]
2. "Insulins"[Mesh]
3. "Neoplasms"[Mesh]
4. risk OR risk\* OR incidence OR inciden\*
5. #1 AND #2 AND #3 AND #4
6. Filters: Humans

295 records

##### Free text search in all fields with filter on publication date 2012 :

1. diabetes OR diabetes\* OR diabetic\* OR diabet\*
2. insulin OR insulin\*
3. tumor OR tumor\* OR tumour OR tumour\* OR cancer OR cancer\* OR neoplasm OR neoplasm\* OR carcinoma OR carcinom\* OR sarcoma OR sarcom\* OR lymphoma OR lymphom\* OR leukemia OR leukem\* OR myeloma OR myelom\*
4. risk OR risk\* OR incidence OR inciden\*
5. #1 AND #2 AND #3 AND #4

6. Filters: Publication date from 2012 / 01 / 01 to 2012 / 12 / 31  
284 records

### **Embase (Ovid)**

#### **Emtree search with limit:**

1. exp diabetes mellitus
2. exp insulin derivative
3. exp cancer incidence OR exp cancer risk OR exp carcinogenicity OR exp drug induced cancer OR exp drug carcinogenicity OR exp carcinogenesis
4. 1 AND 2 AND 3
5. limit 4 to human

816 records

#### **Free text search in title / abstract / keywords with limit on publication year 2012:**

1. "diabet\*".ti,ab,kw.
2. "insulin\*".ti,ab,kw.
3. (risk\* or inciden\*).ti,ab,kw.
4. (cancer\* or neoplasm\* or tumor\* or tumour\* or carcinom\* or sarcom\* or lymphom\* or leukem\* or myelom\*).ti,ab,kw.
5. 1 AND 2 AND 3 AND 4
6. limit 5 to yr="2012 -Current"

295 records

### **Scopus (SciVerse)**

#### **Free text search search in title / abstract / keywords:**

1. TITLE-ABS-KEY(\*diabet\*)
2. TITLE(\*insulin\*)
3. TITLE-ABS-KEY(risk\* OR inciden\*)
4. TITLE(\*cancer\* OR \*neoplasm\* OR \*tumor\* OR \*tumour\* OR \*carcinom\* OR \*sarcom\* OR \*lymphom\* OR \*leukem\* OR \*myelom\*)
5. 1 and 2 and 3 and 4

313 records

### **Web of Science WoS (ISI Web of Knowledge, Thomson Reuters)**

#### **Free text search search in title / abstract / keywords (topic):**

1. topic=(\*diabet\*)
2. title=(\*insulin\*)
3. topic=(risk\* OR inciden\*)
4. title=(\*cancer\* OR \*neoplasm\* OR \*tumor\* OR \*tumour\* OR \*carcinom\* OR \*sarcom\* OR \*lymphom\* OR \*leukem\* OR \*myelom\*)
5. 1 AND 2 AND 3 AND 4

239 records

### **The Cochrane Library (Wiley)**

Databases selected: Cochrane Central Register of Controlled Trials (Clinical Trials), Cochrane Database of Systematic Reviews (Cochrane Reviews), Database of Abstracts of Reviews of Effects (Other Reviews), Cochrane Methodology Register (Methods

Studies), Health Technology Assessment Database (Technology Assessments), NHS Economic Evaluation Database (Economic Evaluations), About The Cochrane Collaboration (Cochrane Groups).

**MESH search:**

1. "Diabetes Mellitus"[Mesh]
2. "Insulins"[Mesh]
3. "Neoplasms"[Mesh]
4. 1 AND 2 AND 3

11 records

**Free text search search in title / abstract / keywords limited to dates 2011-2012:**

1. (\*diabet\*):ti,ab,kw
2. (\*insulin\*):ti,ab,kw
3. (risk\* OR inciden\*):ti,ab,kw
4. (\*cancer\* or \*neoplasm\* or \*tumor\* or \*tumour\* or \*carcinom\* or \*sarcom\* or \*lymphom\* or \*leukem\* or \*myelom\*):ti,ab,kw
5. 1 AND 2 AND 3 AND 4
6. Limit Dates 2011-2012

32 records

## Supplementary Material 2: Newcastle – Ottawa Quality Assessment Scale

[http://www.ohri.ca/programs/clinical\\_epidemiology/oxford.asp](http://www.ohri.ca/programs/clinical_epidemiology/oxford.asp)

### CASE CONTROL STUDIES

**Note:** A study can be awarded a maximum of one star for each numbered item within the Selection and Exposure categories. A maximum of two stars can be given for Comparability.

#### Selection

- 1) Is the case definition adequate?
  - a) Yes, with independent validation \*
  - b) Yes, e.g. record linkage or based on self-reports \*
  - c) No description
- 2) Representativeness of the cases
  - a) Consecutive or obviously representative series of cases \*
  - b) Potential for selection biases or not stated
- 3) Selection of Controls
  - a) Community controls \*
  - b) Hospital controls
  - c) No description
- 4) Definition of Controls
  - a) No history of disease (endpoint) \*
  - b) No description of source

#### Comparability

- 1) Comparability of cases and controls on the basis of the design or analysis
  - a) Study controls for age (user-defined) (Select the most important factor.) \*
  - b) Study controls for any additional factor (This criteria could be modified to indicate specific control for a second important factor.) \*

#### Exposure

- 1) Ascertainment of exposure
  - a) Secure record (e.g. surgical records) \*
  - b) Structured interview where blind to case / control status \*
  - c) Interview not blinded to case / control status
  - d) Written self-report or medical record only
  - e) No description
- 2) Same method of ascertainment for cases and controls
  - a) Yes \*
  - b) No
- 3) Non-Response rate
  - a) Same rate for both groups \*
  - b) Non-respondents described
  - c) Rate different and no designation

### COHORT STUDIES

**Note:** A study can be awarded a maximum of one star for each numbered item within the Selection and Outcome categories. A maximum of two stars can be given for Comparability

#### Selection

- 1) Representativeness of the exposed cohort
  - a) Truly representative of the average diabetic population using insulin (user-defined) in the community \*
  - b) Somewhat representative of the average diabetic population using insulin (user-defined) in the community \*
  - c) Selected group of users e.g. nurses, volunteers
  - d) No description of the derivation of the cohort
- 2) Selection of the non-exposed cohort

- a) Drawn from the same community as the exposed cohort \*
- b) Drawn from a different source
- c) No description of the derivation of the non-exposed cohort
- 3) Ascertainment of exposure
  - a) Secure record (e.g. surgical records) \*
  - b) Structured interview \*
  - c) Written self-report
  - d) No description
- 4) Demonstration that outcome of interest was not present at start of study
  - a) Yes \*
  - b) No

### Comparability

- 1) Comparability of cohorts on the basis of the design or analysis
  - a) Study controls for age (user-defined) (select the most important factor) \*
  - b) Study controls for any additional factor (This criteria could be modified to indicate specific control for a second important factor.) \*

### Outcome

- 1) Assessment of outcome
  - a) Independent blind assessment \*
  - b) Record linkage \*
  - c) Self-report
  - d) No description
- 2) Was follow-up long enough for outcomes to occur
  - a) Yes, > 5 years (user-defined) (select an adequate follow up period for outcome of interest) \*
  - b) No
- 3) Adequacy of follow up of cohorts
  - a) Complete follow up - all subjects accounted for \*
  - b) Subjects lost to follow up unlikely to introduce bias (small number lost): >90 % (user-defined) follow-up, or description provided of those lost \*
  - c) Follow up rate ≤10 % (user-defined) and no description of those lost
  - d) No statement.

## Supplementary Material 3

Presents all estimates extracted from each study for all cancer sites and exposure contrasts, sorted by author name and publication year. The same study can have several risk estimates for each combination of exposure contrast and cancer site if several study designs have been employed in the study (e.g. intention-to-treat and as-treated analysis, with and without latency periods, incident and prevalent users, diabetes types). If risk estimates for strata of dose / duration are presented, these are separated by “ / ” in tables.

### 1) Cohort studies (27 studies).

| Author (country)   | Outcome <sup>‡</sup> | Exposure      | Comparator | Gender | Risk estimate <sup>†</sup> | 95% Confidence Interval |      |
|--------------------|----------------------|---------------|------------|--------|----------------------------|-------------------------|------|
| Blin 2012 [25]     | any                  | glargine only | human only | both   | 0.59                       | 0.28                    | 1.25 |
| Campbell 2010 [26] | colorectal           | insulin       | no insulin | men    | 1.11                       | 0.82                    | 1.51 |
| Campbell 2010 [26] | colorectal           | insulin       | no insulin | women  | 0.94                       | 0.60                    | 1.48 |
| Campbell 2010 [26] | colon                | insulin       | no insulin | men    | 1.13                       | 0.79                    | 1.61 |
| Campbell 2010 [26] | colon                | insulin       | no insulin | women  | 1.04                       | 0.62                    | 1.73 |
| Campbell 2010 [26] | rectal               | insulin       | no insulin | men    | 1.05                       | 0.58                    | 1.90 |

| Author (country)     | Outcome <sup>‡</sup> | Exposure | Comparator | Gender | Risk estimate <sup>†</sup> | 95% Confidence Interval |      |
|----------------------|----------------------|----------|------------|--------|----------------------------|-------------------------|------|
| Campbell 2010 [26]   | rectal               | insulin  | no insulin | women  | 0.65                       | 0.24                    | 1.75 |
| Carstensen 2012 [27] | any excl nmsc        | insulin  | no insulin | men    | 1.14                       | 1.08                    | 1.20 |
| Carstensen 2013 [27] | any excl nmsc        | insulin  | no insulin | women  | 1.23                       | 1.16                    | 1.30 |
| Carstensen 2013 [27] | oesophagus           | insulin  | no insulin | men    | 0.98                       | 0.67                    | 1.43 |
| Carstensen 2013 [27] | oesophagus           | insulin  | no insulin | women  | 1.19                       | 0.57                    | 2.49 |
| Carstensen 2013 [27] | stomach              | insulin  | no insulin | men    | 1.23                       | 0.90                    | 1.68 |
| Carstensen 2013 [27] | stomach              | insulin  | no insulin | women  | 1.43                       | 0.89                    | 2.28 |
| Carstensen 2013 [27] | colon                | insulin  | no insulin | men    | 1.00                       | 0.84                    | 1.19 |
| Carstensen 2013 [27] | colon                | insulin  | no insulin | women  | 0.90                       | 0.73                    | 1.12 |
| Carstensen 2013 [27] | rectal               | insulin  | no insulin | men    | 0.98                       | 0.77                    | 1.24 |
| Carstensen 2013 [27] | rectal               | insulin  | no insulin | women  | 0.91                       | 0.62                    | 1.32 |
| Carstensen 2013 [27] | colorectal           | insulin  | no insulin | men    | 0.99                       | 0.86                    | 1.14 |
| Carstensen 2013 [27] | colorectal           | insulin  | no insulin | women  | 0.90                       | 0.75                    | 1.09 |
| Carstensen 2013 [27] | liver                | insulin  | no insulin | men    | 2.41                       | 1.93                    | 3.00 |
| Carstensen 2013 [27] | liver                | insulin  | no insulin | women  | 2.59                       | 1.58                    | 4.23 |
| Carstensen 2013 [27] | pancreatic           | insulin  | no insulin | men    | 2.92                       | 2.49                    | 3.42 |
| Carstensen 2013 [27] | pancreatic           | insulin  | no insulin | women  | 3.30                       | 2.77                    | 3.93 |
| Carstensen 2013 [27] | respiratory          | insulin  | no insulin | men    | 1.28                       | 1.13                    | 1.45 |
| Carstensen 2013 [27] | respiratory          | insulin  | no insulin | women  | 1.31                       | 1.11                    | 1.54 |
| Carstensen 2013 [27] | melanoma             | insulin  | no insulin | men    | 0.80                       | 0.57                    | 1.12 |
| Carstensen 2013 [27] | melanoma             | insulin  | no insulin | women  | 1.10                       | 0.76                    | 1.60 |
| Carstensen 2013 [27] | kidney               | insulin  | no insulin | men    | 1.39                       | 1.06                    | 1.83 |
| Carstensen 2013 [27] | kidney               | insulin  | no insulin | women  | 2.04                       | 1.45                    | 2.86 |
| Carstensen 2013 [27] | bladder              | insulin  | no insulin | men    | 0.91                       | 0.75                    | 1.10 |
| Carstensen 2013 [27] | bladder              | insulin  | no insulin | women  | 1.13                       | 0.77                    | 1.64 |
| Carstensen 2013 [27] | brain                | insulin  | no insulin | men    | 1.00                       | 0.69                    | 1.44 |
| Carstensen 2013 [27] | brain                | insulin  | no insulin | women  | 1.47                       | 1.00                    | 2.18 |
| Carstensen 2013 [27] | thyroid              | insulin  | no insulin | men    | 1.38                       | 0.57                    | 3.35 |
| Carstensen 2013 [27] | thyroid              | insulin  | no insulin | women  | 2.05                       | 1.07                    | 3.90 |
| Carstensen 2013 [27] | HL                   | insulin  | no insulin | men    | 1.07                       | 0.50                    | 2.29 |
| Carstensen 2013 [27] | HL                   | insulin  | no insulin | women  | 0.52                       | 0.12                    | 2.22 |
| Carstensen 2013 [27] | NHL                  | insulin  | no insulin | men    | 0.85                       | 0.60                    | 1.19 |
| Carstensen 2013 [27] | NHL                  | insulin  | no insulin | women  | 1.18                       | 0.81                    | 1.73 |
| Carstensen 2013 [27] | multiple myeloma     | insulin  | no insulin | men    | 0.92                       | 0.57                    | 1.49 |

| Author (country)     | Outcome <sup>‡</sup>   | Exposure                | Comparator                 | Gender | Risk estimate <sup>†</sup>                   | 95% Confidence Interval                                                 |
|----------------------|------------------------|-------------------------|----------------------------|--------|----------------------------------------------|-------------------------------------------------------------------------|
| Carstensen 2013 [27] | multiple myeloma       | insulin                 | no insulin                 | women  | 0.74                                         | 0.36 / 1.52                                                             |
| Carstensen 2013 [27] | leukaemia              | insulin                 | no insulin                 | men    | 1.01                                         | 0.72 / 1.43                                                             |
| Carstensen 2013 [27] | leukaemia              | insulin                 | no insulin                 | women  | 1.08                                         | 0.70 / 1.66                                                             |
| Carstensen 2013 [27] | breast                 | insulin                 | no insulin                 | men    | 2.59                                         | 0.84 / 7.94                                                             |
| Carstensen 2013 [27] | breast                 | insulin                 | no insulin                 | women  | 0.96                                         | 0.84 / 1.09                                                             |
| Carstensen 2013 [27] | cervical               | insulin                 | no insulin                 | women  | 1.37                                         | 0.89 / 2.09                                                             |
| Carstensen 2013 [27] | uterus                 | insulin                 | no insulin                 | women  | 1.05                                         | 0.82 / 1.36                                                             |
| Carstensen 2013 [27] | ovarian                | insulin                 | no insulin                 | women  | 1.07                                         | 0.76 / 1.50                                                             |
| Carstensen 2013 [27] | prostate               | insulin                 | no insulin                 | men    | 0.79                                         | 0.69 / 0.90                                                             |
| Carstensen 2013 [27] | testis                 | insulin                 | no insulin                 | men    | 0.57                                         | 0.25 / 1.28                                                             |
| Chang 2011 [28]      | any                    | glargine                | human int-/long-acting     | both   | 0.86                                         | 0.73 / 1.02                                                             |
| Chang 2011 [28]      | liver                  | glargine                | human int-/long-acting     | both   | 0.76                                         | 0.54 / 1.08                                                             |
| Chang 2011 [28]      | colorectal             | glargine                | human int-/long-acting     | both   | 0.78                                         | 0.49 / 1.26                                                             |
| Chang 2011 [28]      | pancreatic             | glargine                | human int-/long-acting     | both   | 1.85                                         | 1.06 / 3.22                                                             |
| Chang 2011 [28]      | lung                   | glargine                | human int-/long-acting     | both   | 1.01                                         | 0.59 / 1.71                                                             |
| Chang 2011 [28]      | composite <sup>‡</sup> | glargine                | human int-/long-acting     | both   | 0.54                                         | 0.25 / 1.16                                                             |
| Chang 2011 [28]      | stomach                | glargine                | human int-/long-acting     | both   | 0.62                                         | 0.27 / 1.42                                                             |
| Chang 2011 [28]      | skin                   | glargine                | human int-/long-acting     | both   | 1.08                                         | 0.48 / 2.46                                                             |
| Chang 2011 [28]      | breast                 | glargine                | human int-/long-acting     | women  | 0.53                                         | 0.21 / 1.31                                                             |
| Chang 2011 [28]      | prostate               | glargine                | human int-/long-acting     | men    | 2.37                                         | 0.94 / 6.01                                                             |
| Chang 2011 [28]      | any                    | glargine                | human int-/long-acting     | both   | 0.81 / 0.75 / 0.79 / 0.6 / 0.5 / 0.54 / 1.18 | 1.07 / 1.11 / 1.16 / 1.67 / 135/135-300/>300 DDD                        |
| Chang 2011 [28]      | pancreatic             | glargine                | human int-/long-acting     | both   | 1.23 / 1.19 / 1.15 / 7.90                    | 0.53 / 0.34 / 0.27 / 2.84 / 4.17 / 5.00 / 23.71 / 135/135-300/>300 DDD  |
| Chang 2011 [28]      | prostate               | glargine                | human int-/long-acting     | men    | 1.88 / 2.06 / 5.37 / 2.16                    | 0.30 / 0.29 / 0.71 / 0.33 / 11.63 / 14.7 / 40.85 / 135/135-300/>300 DDD |
| Chang 2011 [28]      | any                    | glargine                | human int-/long-acting     | both   | 0.83 / 0.91                                  | 0.69 / 0.61 / 1.01 / 1.36 / cumulative duration (<1/≥1 year)            |
| Chang 2011 [28]      | pancreatic             | glargine                | human int-/long-acting     | both   | 1.75 / 2.58                                  | 0.98 / 0.50 / 3.12 / 13.23 / cumulative duration (<1/≥1 year)           |
| Chang 2011 [28]      | prostate               | glargine                | human int-/long-acting     | men    | 2.52 / 1.79                                  | 0.87 / 0.26 / 7.25 / 12.33 / cumulative duration (<1/≥1 year)           |
| Chang 2011 [28]      | any                    | glargine                | human int-/long-acting     | both   | 0.68 / 1.05                                  | 0.52 / 0.84 / 0.89 / 1.32 / mean daily dose (<0.5/≥0.5 DDD/day)         |
| Chang 2011 [28]      | pancreatic             | glargine                | human int-/long-acting     | both   | 1.92 / 1.84                                  | 0.85 / 0.86 / 4.32 / 3.95 / mean daily dose (<0.5/≥0.5 DDD/day)         |
| Chang 2011 [28]      | prostate               | glargine                | human int-/long-acting     | men    | 2.95 / 1.98                                  | 0.83 / 0.47 / 10.43 / 8.40 / mean daily dose (<0.5/≥0.5 DDD/day)        |
| Colhoun 2010 [29]    | any excl nmsc          | glargine only           | non-glargine insulins only | both   | 1.64                                         | 1.05 / 2.54                                                             |
| Colhoun 2010 [29]    | any excl nmsc          | glargine + non-glargine | non-glargine insulins only | both   | 0.78                                         | 0.53 / 1.16                                                             |
| Colhoun 2010 [29]    | any excl nmsc          | glargine                | non-glargine insulins only | both   | 1.02                                         | 0.77 / 1.36                                                             |
| Colhoun 2010 [29]    | any excl nmsc          | glargine                | non-glargine insulins only | both   | 1.08                                         | 0.78 / 1.49                                                             |

| Author (country)  | Outcome <sup>‡</sup> | Exposure                | Comparator                 | Gender | Risk estimate <sup>†</sup> | 95% Confidence Interval |       |
|-------------------|----------------------|-------------------------|----------------------------|--------|----------------------------|-------------------------|-------|
| Colhoun 2010 [29] | any excl nmsc        | glargine only           | non-glargine insulins only | both   | 1.58                       | 1.03                    | 2.42  |
| Colhoun 2010 [29] | any excl nmsc        | glargine                | non-glargine insulins only | both   | 1.02                       | 0.50                    | 2.09  |
| Colhoun 2010 [29] | any excl nmsc        | glargine only           | non-glargine insulins only | both   | 1.73                       | 0.98                    | 3.05  |
| Colhoun 2010 [29] | any excl nmsc        | glargine + non-glargine | non-glargine insulins only | both   | 0.88                       | 0.55                    | 1.40  |
| Colhoun 2010 [29] | breast               | glargine                | non-glargine insulins only | women  | 1.49                       | 0.79                    | 2.83  |
| Colhoun 2010 [29] | breast               | glargine only           | non-glargine insulins only | women  | 3.65                       | 1.05                    | 12.68 |
| Colhoun 2010 [29] | breast               | glargine + non-glargine | non-glargine insulins only | women  | 1.10                       | 0.38                    | 3.16  |
| Colhoun 2010 [29] | prostate             | glargine only           | non-glargine insulins only | men    | 1.16                       | 0.16                    | 8.50  |
| Colhoun 2010 [29] | prostate             | glargine + non-glargine | non-glargine insulins only | men    | 1.76                       | 0.54                    | 5.74  |
| Colhoun 2010 [29] | colorectal           | glargine only           | non-glargine insulins only | both   | 1.43                       | 0.45                    | 4.57  |
| Colhoun 2010 [29] | colorectal           | glargine + non-glargine | non-glargine insulins only | both   | 0.36                       | 0.09                    | 1.45  |
| Colhoun 2010 [29] | lung                 | glargine only           | non-glargine insulins only | both   | 1.43                       | 0.53                    | 3.88  |
| Colhoun 2010 [29] | lung                 | glargine + non-glargine | non-glargine insulins only | both   | 0.47                       | 0.18                    | 1.25  |
| Colhoun 2010 [29] | pancreatic           | glargine only           | non-glargine insulins only | both   | ne                         | -                       | -     |
| Colhoun 2010 [29] | pancreatic           | glargine + non-glargine | non-glargine insulins only | both   | 0.54                       | 0.08                    | 4.32  |
| Colhoun 2010 [29] | any excl nmsc        | glargine only           | non-glargine insulins only | both   | 0.87                       | 0.63                    | 1.21  |
| Colhoun 2010 [29] | any excl nmsc        | glargine + non-glargine | non-glargine insulins only | both   | 1.20                       | 0.69                    | 2.09  |
| Colhoun 2010 [29] | breast               | glargine only           | non-glargine insulins only | women  | 1.47                       | 0.59                    | 3.64  |
| Colhoun 2010 [29] | breast               | glargine + non-glargine | non-glargine insulins only | women  | ne                         | -                       | -     |
| Colhoun 2010 [29] | any excl nmsc        | glargine only           | non-glargine insulins only | both   | 1.49                       | 1.09                    | 2.03  |
| Colhoun 2010 [29] | any excl nmsc        | glargine + non-glargine | non-glargine insulins only | both   | 0.65                       | 0.53                    | 0.81  |
| Colhoun 2010 [29] | breast               | glargine only           | non-glargine insulins only | women  | 1.99                       | 0.88                    | 4.49  |
| Colhoun 2010 [29] | breast               | glargine + non-glargine | non-glargine insulins only | women  | 1.19                       | 0.72                    | 1.94  |
| Colhoun 2010 [29] | prostate             | glargine only           | non-glargine insulins only | men    | 1.14                       | 0.45                    | 2.84  |
| Colhoun 2010 [29] | prostate             | glargine + non-glargine | non-glargine insulins only | men    | 1.05                       | 0.58                    | 1.91  |
| Colhoun 2010 [29] | colorectal           | glargine only           | non-glargine insulins only | both   | 1.13                       | 0.62                    | 2.04  |
| Colhoun 2010 [29] | colorectal           | glargine + non-glargine | non-glargine insulins only | both   | 0.58                       | 0.36                    | 0.93  |
| Colhoun 2010 [29] | pancreatic           | glargine only           | non-glargine insulins only | both   | 1.34                       | 0.64                    | 2.78  |
| Colhoun 2010 [29] | pancreatic           | glargine + non-glargine | non-glargine insulins only | both   | 0.11                       | 0.03                    | 0.45  |
| Colhoun 2010 [29] | any excl nmsc        | glargine                | non-glargine insulins only | both   | 0.69                       | 0.60                    | 0.79  |
| Currie 2009 [30]  | any                  | human long-acting only  | glargine only              | both   | 1.24                       | 0.90                    | 1.70  |
| Currie 2009 [30]  | any                  | human biphasic          | glargine only              | both   | 0.88                       | 0.66                    | 1.19  |
| Currie 2009 [30]  | any                  | analog biphasic         | glargine only              | both   | 1.02                       | 0.76                    | 1.37  |
| Currie 2009 [30]  | any                  | insulin                 | metformin only             | both   | 1.42                       | 1.27                    | 1.60  |



| Author (country)  | Outcome <sup>‡</sup>   | Exposure               | Comparator                      | Gender | Risk estimate <sup>†</sup> | 95% Confidence Interval                                                           |
|-------------------|------------------------|------------------------|---------------------------------|--------|----------------------------|-----------------------------------------------------------------------------------|
| Currie 2009 [30]  | any                    | insulin                | metformin only                  | both   | 1.35                       | 1.19 / 1.54                                                                       |
| Currie 2009 [30]  | colorectal             | insulin                | metformin only                  | both   | 1.69                       | 1.23 / 2.33                                                                       |
| Currie 2009 [30]  | pancreatic             | insulin                | metformin only                  | both   | 4.63                       | 2.64 / 8.10                                                                       |
| Currie 2009 [30]  | prostate               | insulin                | metformin only                  | men    | 1.10                       | 0.79 / 1.52                                                                       |
| Currie 2009 [30]  | breast                 | insulin                | metformin only                  | women  | 1.07                       | 0.79 / 1.44                                                                       |
| Currie 2009 [30]  | breast                 | glargine only          | non-glargine insulin            | women  | 0.86                       | 0.42 / 1.75                                                                       |
| Currie 2009 [30]  | composite <sup>‡</sup> | human long-acting only | glargine only                   | both   | 1.17                       | 0.70 / 1.94                                                                       |
| Currie 2009 [30]  | composite <sup>‡</sup> | human biphasic         | glargine only                   | both   | 0.76                       | 0.47 / 1.24                                                                       |
| Currie 2009 [30]  | composite <sup>‡</sup> | analog biphasic        | glargine only                   | both   | 1.01                       | 0.63 / 1.63                                                                       |
| Fagot 2012 [31]   | any                    | glargine               | other int-/long-acting insulins | both   | 1.04                       | 0.93 / 1.16                                                                       |
| Fagot 2012 [31]   | any                    | glargine               | other int-/long-acting insulins | both   | 1.04 / 1.01 / 1.06         | 0.91 / 0.88 / 0.91 / 1.18 / 1.16 / cumulative dose (<14000/14000-27000/27000+ IU) |
| Fagot 2012 [31]   | any                    | detemir                | other int-/long-acting insulins | both   | 1.01                       | 0.89 / 1.13                                                                       |
| Fagot 2012 [31]   | any                    | detemir                | other int-/long-acting insulins | both   | 1.05 / 0.91 / 1.06         | 0.88 / 0.73 / 0.85 / 1.23 / 1.12 / cumulative dose (<14000/14000-27000/27000+ IU) |
| Fagot 2012 [31]   | any                    | human int-/long-acting | other int-/long-acting insulins | both   | 0.91                       | 0.76 / 1.08                                                                       |
| Fagot 2012 [31]   | any                    | human int-/long-acting | other int-/long-acting insulins | both   | 0.93 / 0.89 / 0.89         | 0.73 / 0.65 / 0.63 / 1.18 / 1.21 / cumulative dose (<14000/14000-27000/27000+ IU) |
| Fagot 2012 [31]   | breast                 | glargine               | other int-/long-acting insulins | women  | 1.08                       | 0.72 / 1.62                                                                       |
| Fagot 2012 [31]   | breast                 | glargine               | other int-/long-acting insulins | women  | 0.88 / 1.02 / 1.49         | 0.54 / 0.62 / 0.91 / 1.45 / 1.67 / cumulative dose (<14000/14000-27000/27000+ IU) |
| Fagot 2012 [31]   | breast                 | detemir                | other int-/long-acting insulins | women  | 1.08                       | 0.72 / 1.62                                                                       |
| Fagot 2012 [31]   | breast                 | detemir                | other int-/long-acting insulins | women  | 1.13 / 1.02 / 1.04         | 0.66 / 0.51 / 0.48 / 1.96 / 2.03 / cumulative dose (<14000/14000-27000/27000+ IU) |
| Fagot 2012 [31]   | breast                 | human int-/long-acting | other int-/long-acting insulins | women  | 1.03                       | 0.56 / 1.88                                                                       |
| Fagot 2012 [31]   | breast                 | human int-/long-acting | other int-/long-acting insulins | women  | 1.21 / 1.51 / -            | 0.56 / 0.61 / - / 2.60 / 3.72 / cumulative dose (<14000/14000-27000/27000+ IU)    |
| Fagot 2012 [31]   | colorectal             | glargine               | other int-/long-acting insulins | both   | 0.98                       | 0.72 / 1.32                                                                       |
| Fagot 2012 [31]   | liver                  | glargine               | other int-/long-acting insulins | both   | 1.07                       | 0.72 / 1.59                                                                       |
| Fagot 2012 [31]   | kidney                 | glargine               | other int-/long-acting insulins | both   | 1.11                       | 0.54 / 2.26                                                                       |
| Fagot 2012 [31]   | bladder                | glargine               | other int-/long-acting insulins | both   | 1.06                       | 0.67 / 1.66                                                                       |
| Fagot 2012 [31]   | lung                   | glargine               | other int-/long-acting insulins | both   | 1.10                       | 0.78 / 1.57                                                                       |
| Fagot 2012 [31]   | head+neck              | glargine               | other int-/long-acting insulins | both   | 0.91                       | 0.48 / 1.72                                                                       |
| Fagot 2012 [31]   | prostate               | glargine               | other int-/long-acting insulins | men    | 1.01                       | 0.68 / 1.48                                                                       |
| Ferrara 2011 [32] | prostate               | insulin                | no insulin                      | men    | 0.80                       | 0.70 / 0.90                                                                       |
| Ferrara 2011 [32] | breast                 | insulin                | no insulin                      | women  | 1.00                       | 0.90 / 1.20                                                                       |
| Ferrara 2011 [32] | lung+bronchus          | insulin                | no insulin                      | both   | 1.10                       | 0.90 / 1.30                                                                       |

| Author (country)  | Outcome <sup>‡</sup> | Exposure        | Comparator                 | Gender | Risk estimate <sup>†</sup> | 95% Confidence Interval                                                          |
|-------------------|----------------------|-----------------|----------------------------|--------|----------------------------|----------------------------------------------------------------------------------|
| Ferrara 2011 [32] | colon                | insulin         | no insulin                 | both   | 1.10                       | 0.90 / 1.30                                                                      |
| Ferrara 2011 [32] | NHL                  | insulin         | no insulin                 | both   | 1.00                       | 0.80 / 1.30                                                                      |
| Ferrara 2011 [32] | uterus               | insulin         | no insulin                 | women  | 1.00                       | 0.80 / 1.30                                                                      |
| Ferrara 2011 [32] | pancreatic           | insulin         | no insulin                 | both   | 3.10                       | 2.40 / 4.00                                                                      |
| Ferrara 2011 [32] | kidney+renal pelvis  | insulin         | no insulin                 | both   | 1.30                       | 0.90 / 1.70                                                                      |
| Ferrara 2011 [32] | rectal               | insulin         | no insulin                 | both   | 1.00                       | 0.70 / 1.40                                                                      |
| Ferrara 2011 [32] | melanoma             | insulin         | no insulin                 | both   | 1.10                       | 0.80 / 1.50                                                                      |
| hemkens 2009 [33] | any                  | aspartat only   | human only                 | both   | 1.00 / 1.02 / 1.04         | 0.82 / 0.85 / 0.87 / 1.21 / 1.22 / mean daily dose (10/30/50 IU mean daily dose) |
| hemkens 2009 [33] | any                  | lispro only     | human only                 | both   | 0.99 / 0.98 / 0.98         | 0.82 / 0.83 / 0.83 / 1.19 / 1.16 / mean daily dose (10/30/50 IU mean daily dose) |
| hemkens 2009 [33] | any                  | glargine only   | human only                 | both   | 1.09 / 1.19 / 1.31         | 1.00 / 1.10 / 1.20 / 1.19 / 1.30 / mean daily dose (10/30/50 IU mean daily dose) |
| Hense 2011 [34]   | any                  | human only      | no use human insulin       | both   | 1.25                       | 1.17 / 1.33                                                                      |
| Hense 2011 [34]   | any                  | insulin analogs | no use insulin analogs     | both   | 0.89                       | 0.79 / 1.01                                                                      |
| Hsieh 2012 [35]   | any                  | insulin only    | metformin only             | both   | 1.78                       | 1.41 / 2.26                                                                      |
| Hsieh 2012 [35]   | colorectal           | insulin only    | metformin only             | both   | 2.14                       | 1.23 / 3.72                                                                      |
| Hsieh 2012 [35]   | lung                 | insulin only    | metformin only             | both   | 1.06                       | 0.51 / 2.18                                                                      |
| Hsieh 2012 [35]   | liver                | insulin only    | metformin only             | both   | 1.82                       | 1.08 / 3.08                                                                      |
| Hsieh 2012 [35]   | stomach              | insulin only    | metformin only             | both   | 1.86                       | 0.78 / 4.42                                                                      |
| Hsieh 2012 [35]   | pancreatic           | insulin only    | metformin only             | both   | 0.69                       | 0.09 / 5.55                                                                      |
| Hsieh 2012 [35]   | breast               | insulin only    | metformin only             | women  | 1.63                       | 0.60 / 4.40                                                                      |
| Hsieh 2012 [35]   | prostate             | insulin only    | metformin only             | men    | 0.89                       | 0.34 / 2.36                                                                      |
| Kostev 2012 [36]  | breast               | glargine        | nph insulin                | women  | 0.93                       | 0.68 / 1.27                                                                      |
| Kostev 2012 [36]  | breast               | detemir         | nph insulin                | women  | 1.17                       | 0.66 / 2.06                                                                      |
| Lai 2012 [37]     | pancreatic           | insulin         | no insulin                 | both   | 2.20                       | 1.40 / 3.45                                                                      |
| Lai 2012 [38]     | lung                 | insulin         | no insulin                 | both   | 1.00                       | 0.68 / 1.45                                                                      |
| Lai 2012 [39]     | hcc                  | insulin         | no insulin                 | both   | 0.98                       | 0.74 / 1.28                                                                      |
| Lind 2012 [40]    | breast               | glargine        | no glargine                | women  | 1.54                       | 0.90 / 2.67                                                                      |
| Lind 2012 [40]    | prostate             | glargine        | no glargine                | men    | 1.37                       | 0.78 / 2.39                                                                      |
| Ljung 2011 [41]   | any                  | glargine only   | non-glargine insulins only | both   | 1.10                       | 0.96 / 1.26                                                                      |
| Ljung 2011 [41]   | gastrointestinal     | glargine only   | non-glargine insulins only | both   | 0.86                       | 0.61 / 1.23                                                                      |
| Ljung 2011 [41]   | colorectal           | glargine only   | non-glargine insulins only | both   | 0.88                       | 0.61 / 1.28                                                                      |

| Author (country)   | Outcome <sup>‡</sup> | Exposure                | Comparator                 | Gender | Risk estimate <sup>†</sup> | 95% Confidence Interval |                                           |
|--------------------|----------------------|-------------------------|----------------------------|--------|----------------------------|-------------------------|-------------------------------------------|
| Ljung 2011 [41]    | pancreatic           | glargine only           | non-glargine insulins only | both   | 1.52                       | 0.82                    | 2.83                                      |
| Ljung 2011 [41]    | prostate             | glargine only           | non-glargine insulins only | men    | 1.11                       | 0.81                    | 1.52                                      |
| Ljung 2011 [41]    | breast               | glargine only           | non-glargine insulins only | women  | 1.60                       | 1.10                    | 2.32                                      |
| Ljung 2011 [41]    | breast               | glargine only           | non-glargine insulins only | women  | 1.58                       | 1.09                    | 2.29                                      |
| Ljung 2011 [41]    | breast               | glargine only           | non-glargine insulins only | women  | 1.60                       | 1.07                    | 2.39                                      |
| Ljung 2011 [41]    | any                  | glargine only           | non-glargine insulins only | both   | 1.10                       | 0.90                    | 1.35                                      |
| Ljung 2011 [41]    | gastrointestinal     | glargine only           | non-glargine insulins only | both   | 0.80                       | 0.46                    | 1.38                                      |
| Ljung 2011 [41]    | colorectal           | glargine only           | non-glargine insulins only | both   | 0.76                       | 0.41                    | 1.38                                      |
| Ljung 2011 [41]    | pancreatic           | glargine only           | non-glargine insulins only | both   | 1.04                       | 0.32                    | 3.31                                      |
| Ljung 2011 [41]    | prostate             | glargine only           | non-glargine insulins only | men    | 1.19                       | 0.76                    | 1.87                                      |
| Ljung 2011 [41]    | breast               | glargine only           | non-glargine insulins only | women  | 0.87                       | 0.41                    | 1.85                                      |
| Morden 2011 [42]   | any                  | glargine only           | non-glargine insulins only | both   | 0.94                       | 0.88                    | 1.01                                      |
| Morden 2011 [42]   | any                  | glargine + non-glargine | non-glargine insulins only | both   | 0.94                       | 0.87                    | 1.01                                      |
| Morden 2011 [42]   | colon                | glargine only           | non-glargine insulins only | both   | 0.79                       | 0.60                    | 1.05                                      |
| Morden 2011 [42]   | colon                | glargine + non-glargine | non-glargine insulins only | both   | 0.95                       | 0.74                    | 1.23                                      |
| Morden 2011 [42]   | pancreatic           | glargine only           | non-glargine insulins only | both   | 0.95                       | 0.67                    | 1.35                                      |
| Morden 2011 [42]   | pancreatic           | glargine + non-glargine | non-glargine insulins only | both   | 0.71                       | 0.47                    | 1.07                                      |
| Morden 2011 [42]   | prostate             | glargine only           | non-glargine insulins only | men    | 1.12                       | 0.88                    | 1.42                                      |
| Morden 2011 [42]   | prostate             | glargine + non-glargine | non-glargine insulins only | men    | 0.89                       | 0.68                    | 1.18                                      |
| Morden 2011 [42]   | breast               | glargine only           | non-glargine insulins only | women  | 1.03                       | 0.83                    | 1.29                                      |
| Morden 2011 [42]   | breast               | glargine + non-glargine | non-glargine insulins only | women  | 1.08                       | 0.86                    | 1.36                                      |
| Neumann 2012 [43]  | bladder              | insulin                 | no insulin                 | both   | 1.08                       | 0.97                    | 1.21                                      |
| Neumann 2012 [43]  | colorectal           | insulin                 | no insulin                 | both   | 1.05                       | 1.01                    | 1.11                                      |
| Neumann 2012 [43]  | kidney               | insulin                 | no insulin                 | both   | 1.09                       | 1.00                    | 1.20                                      |
| Neumann 2012 [43]  | lung                 | insulin                 | no insulin                 | both   | 1.23                       | 1.17                    | 1.29                                      |
| Neumann 2012 [43]  | head+neck            | insulin                 | no insulin                 | both   | 1.24                       | 1.14                    | 1.36                                      |
| Neumann 2012 [43]  | breast               | insulin                 | no insulin                 | women  | 0.86                       | 0.81                    | 0.91                                      |
| Newton 2012 [44]   | bladder              | insulin                 | no insulin                 | both   | 1.70                       | 1.13                    | 2.54                                      |
| Oliveria 2008 [45] | bladder              | insulin only            | no insulin                 | both   | 1.09                       | 0.72                    | 1.64                                      |
| Oliveria 2008 [45] | liver                | insulin only            | no insulin                 | both   | 1.19                       | 0.54                    | 2.65                                      |
| Oliveria 2008 [45] | pancreatic           | insulin only            | no insulin                 | both   | 0.64                       | 0.34                    | 1.21                                      |
| Oliveria 2008 [45] | colorectal           | insulin only            | no insulin                 | both   | 0.99                       | 0.74                    | 1.33                                      |
| Oliveria 2008 [45] | colorectal           | insulin only            | other ad drug              | both   | 1.48 / 1.24                | 0.58 / 0.57             | 3.78 / 2.68<br>time of use (past/current) |

| Author (country)   | Outcome <sup>‡</sup> | Exposure                  | Comparator                 | Gender | Risk estimate <sup>†</sup> | 95% Confidence Interval |                                                                |
|--------------------|----------------------|---------------------------|----------------------------|--------|----------------------------|-------------------------|----------------------------------------------------------------|
| Redaniel 2012 [46] | breast               | insulin only              | no ad drugs                | women  | 0.72                       | 0.60                    | 0.87                                                           |
| Redaniel 2012 [46] | breast               | insulin only              | sulfonylurea only          | women  | 1.14                       | 0.54                    | 2.39                                                           |
| Redaniel 2012 [46] | breast               | insulin only              | sulfonylurea only          | women  | 1.33                       | 0.63                    | 2.83                                                           |
| Redaniel 2012 [46] | breast               | insulin only              | sulfonylurea only          | women  | 1.01 / 0.54 / 2.25         | 0.11 / 0.18 / 0.72      | 8.97 / 1.68 / duration since start exp (<1/1-5/>5 years)       |
| Redaniel 2012 [46] | breast               | insulin only              | sulfonylurea only          | women  | 1.33                       | 0.63                    | 2.78                                                           |
| Redaniel 2012 [46] | breast               | insulin only              | sulfonylurea only          | women  | 1.67                       | 0.70                    | 3.99                                                           |
| Ruiter 2012 [47]   | any                  | glargine only             | human only                 | both   | 0.75                       | 0.71                    | 0.80                                                           |
| Ruiter 2012 [47]   | any                  | non-glargine analogs only | human only                 | both   | 0.85                       | 0.82                    | 0.89                                                           |
| Ruiter 2012 [47]   | colon                | glargine only             | human only                 | both   | 0.55                       | 0.39                    | 0.76                                                           |
| Ruiter 2012 [47]   | colon                | non-glargine analogs only | human only                 | both   | 1.07                       | 0.93                    | 1.25                                                           |
| Ruiter 2012 [47]   | bladder              | glargine only             | human only                 | both   | 1.89                       | 0.69                    | 3.21                                                           |
| Ruiter 2012 [47]   | bladder              | non-glargine analogs only | human only                 | both   | 0.48                       | 0.34                    | 0.69                                                           |
| Ruiter 2012 [47]   | respiratory          | glargine only             | human only                 | both   | 1.03                       | 0.84                    | 1.24                                                           |
| Ruiter 2012 [47]   | respiratory          | non-glargine analogs only | human only                 | both   | 0.64                       | 0.54                    | 0.77                                                           |
| Ruiter 2012 [47]   | prostate             | glargine only             | human only                 | men    | 2.76                       | 1.32                    | 5.80                                                           |
| Ruiter 2012 [47]   | prostate             | non-glargine analogs only | human only                 | men    | 0.83                       | 0.70                    | 1.03                                                           |
| Ruiter 2012 [47]   | breast               | glargine only             | human only                 | women  | 1.58                       | 1.22                    | 2.05                                                           |
| Ruiter 2012 [47]   | breast               | non-glargine analogs only | human only                 | women  | 0.95                       | 0.83                    | 1.08                                                           |
| Ruiter 2012 [47]   | any                  | glargine                  | human                      | both   | 0.77                       | 0.73                    | 0.82                                                           |
| Ruiter 2012 [47]   | any                  | non-glargine analogs only | human                      | both   | 0.85                       | 0.82                    | 0.88                                                           |
| Ruiter 2012 [47]   | colon                | glargine                  | human                      | both   | 0.61                       | 0.43                    | 0.88                                                           |
| Ruiter 2012 [47]   | colon                | non-glargine analogs only | human                      | both   | 0.87                       | 0.78                    | 0.97                                                           |
| Ruiter 2012 [47]   | bladder              | glargine                  | human                      | both   | 1.77                       | 1.04                    | 3.00                                                           |
| Ruiter 2012 [47]   | bladder              | non-glargine analogs only | human                      | both   | 0.69                       | 0.57                    | 0.84                                                           |
| Ruiter 2012 [47]   | respiratory          | glargine                  | human                      | both   | 0.92                       | 0.74                    | 1.16                                                           |
| Ruiter 2012 [47]   | respiratory          | non-glargine analogs only | human                      | both   | 0.70                       | 0.62                    | 0.78                                                           |
| Ruiter 2012 [47]   | prostate             | glargine                  | human                      | men    | 1.17                       | 0.84                    | 1.62                                                           |
| Ruiter 2012 [47]   | prostate             | non-glargine analogs only | human                      | men    | 0.82                       | 0.69                    | 0.97                                                           |
| Ruiter 2012 [47]   | breast               | glargine                  | human                      | women  | 1.39                       | 1.08                    | 1.79                                                           |
| Ruiter 2012 [47]   | breast               | non-glargine analogs only | human                      | women  | 1.00                       | 0.93                    | 1.09                                                           |
| Suissa 2012 [48]   | breast               | glargine                  | non-glargine insulins only | women  | 0.80                       | 0.30                    | 2.10                                                           |
| Suissa 2012 [48]   | breast               | glargine                  | non-glargine insulins only | women  | 1.0 / 0.9 / 0.8 / ne       | 0.3 / 0.3 / 0.2 / ne    | 3.1 / 2.7 / duration since start exp (<1 / 1-3 / 3-5 / >5 yrs) |
| Suissa 2012 [48]   | breast               | glargine                  | non-glargine insulins only | women  | 1.00                       | 0.70                    | 1.40                                                           |
| Suissa 2012 [48]   | breast               | glargine                  | non-glargine insulins only | women  | 0.9 / 1.0 / 0.8 / 1.8      | 0.5 / 0.6 / 0.5 / 0.8   | 1.5 / 1.7 / duration since start exp (<1 / 1-3 / 3-5 / >5 yrs) |

| Author (country)   | Outcome <sup>‡</sup> | Exposure     | Comparator     | Gender | Risk estimate <sup>†</sup>                                                         | 95% Confidence Interval                                                                    |
|--------------------|----------------------|--------------|----------------|--------|------------------------------------------------------------------------------------|--------------------------------------------------------------------------------------------|
| Tseng 2012 [49]    | NHL                  | insulin      | no insulin     | both   | 2.52                                                                               | 1.37 / 4.64                                                                                |
| Van Staa 2012 [50] | any excl nmsc        | insulin only | metformin only | both   | 1.49 / 1.36 / 1.23 / 1.27 / 1.15 / 1.04 / 1.75 / 1.61 / duration since 1.05 / 1.17 | 0.86 / 0.95 / 1.46 / 1.27 / start exp (<273 / 274-546 / 547-1001 / 1002-1547 / 1548+ days) |
| Yang 2010 [51]     | any                  | insulin      | no insulin     | both   | 0.17                                                                               | 0.09 / 0.32                                                                                |
| Yang 2010 [51]     | digestive+peritoneum | insulin      | no insulin     | both   | 0.19                                                                               | 0.08 / 0.46                                                                                |

## 2) Case control studies (15 studies)

| Author (country)  | Outcome    | Exposure           | Comparator                | Gender | Risk estimate <sup>†</sup> | 95% Confidence Interval   | Dose/duration strata <sup>†</sup> |                                                  |
|-------------------|------------|--------------------|---------------------------|--------|----------------------------|---------------------------|-----------------------------------|--------------------------------------------------|
| Bodmer 2010 [52]  | breast     | insulin            | no insulin                | women  | 1.74 / 1.30 / 1.51         | 0.95 / 0.62 / 0.76        | 3.21 / 2.70 / 3.01                | number of prescriptions (1-9/10-29/30+ rx)       |
| Bodmer 2011 [53]  | ovarian    | insulin            | no insulin                | women  | 4.67 / 1.17 / 1.46         | 1.07 / 0.43 / 0.54        | 20.42 / 3.14 / 3.98               | number of prescriptions (1-9/10-29/30+ rx)       |
| Bodmer 2012 [54]  | colorectal | Insulin            | no insulin                | both   | 1.11 / 0.64 / 1.07 / 0.90  | 0.75 / 0.44 / 0.73 / 0.63 | 1.64 / 0.95 / 1.57 / 1.28         | number of prescriptions (1-9/10-29/30-49/50+ rx) |
| Bodmer 2012 [55]  | lung       | Insulin            | no insulin                | both   | 1.64 / 1.16 / 1.53         | 1.20 / 0.84 / 1.18        | 2.24 / 1.59 / 1.99                | number of prescriptions (1-14/10-39/40+ rx)      |
| Bonelli 2003 [56] | pancreatic | insulin            | oad                       | both   | 7.68                       | 1.67                      | 35.40                             | 0.00                                             |
| Chang 2012 [57]   | liver      | human short-acting | no use human short-acting | both   | 2.35                       | 2.21                      | 2.49                              | 0.00                                             |
| Chang 2012 [57]   | colorectal | human short-acting | no use human short-acting | both   | 2.56                       | 2.40                      | 2.72                              | 0.00                                             |
| Chang 2012 [57]   | lung       | human short-acting | no use human short-acting | both   | 1.90                       | 1.76                      | 2.03                              | 0.00                                             |
| Chang 2012 [57]   | bladder    | human short-acting | no use human short-acting | both   | 1.11                       | 0.96                      | 1.28                              | 0.00                                             |
| Chang 2012 [58]   | any        | insulin            | no insulin                | both   | 1.97                       | 1.85                      | 2.09                              | 0.00                                             |
| Chang 2012 [58]   | any        | insulin            | no insulin                | both   | 1.03 / 1.32 / 9.94         | 0.95 / 1.18 / 8.93        | 1.12 / 1.49 / 11.08               | time of use (past/recent/current)                |
| Chang 2012 [58]   | any        | insulin            | no insulin                | both   | 2.23 / 1.93 / 1.73         | 2.05 / 1.77 / 1.57        | 2.43 / 2.11 / 1.90                | cumulative dose (low/intermediate/high)          |
| Chang 2012 [58]   | any        | insulin            | no insulin                | both   | 2.00 / 2.00 / 1.53         | 1.88 / 1.59 / 1.21        | 2.12 / 2.51 / 1.93                | cumulative duration (<1/1-2/2+ years)            |
| Chang 2012 [58]   | colorectal | insulin            | no insulin                | both   | 2.67                       | 2.29                      | 3.12                              | 0.00                                             |
| Chang 2012 [58]   | lung       | insulin            | no insulin                | both   | 1.86                       | 1.56                      | 2.23                              | 0.00                                             |
| Chang 2012 [58]   | breast     | insulin            | no insulin                | both?  | 0.93                       | 0.69                      | 1.25                              | 0.00                                             |
| Chang 2012 [58]   | prostate   | insulin            | no insulin                | men    | 0.88                       | 0.64                      | 1.20                              | 0.00                                             |
| Chang 2012 [58]   | stomach    | insulin            | no insulin                | both   | 2.46                       | 1.91                      | 3.17                              | 0.00                                             |
| Chang 2012 [58]   | pancreatic | insulin            | no insulin                | both   | 3.75                       | 2.61                      | 5.38                              | 0.00                                             |
| Chang 2012 [58]   | liver      | insulin            | no insulin                | both   | 1.98                       | 1.71                      | 2.31                              | 0.00                                             |

| Author (country)    | Outcome    | Exposure     | Comparator         | Gender | Risk estimate <sup>†</sup> | 95% Confidence Interval |                     | Dose/duration strata <sup>†</sup>        |
|---------------------|------------|--------------|--------------------|--------|----------------------------|-------------------------|---------------------|------------------------------------------|
| Chang 2012 [58]     | liver      | insulin      | no insulin         | both   | 1.11 / 1.74 / 10.28        | 0.92 / 1.32 / 7.68      | 1.35 / 2.31 / 13.74 | time of use (past/recent/current)        |
| Chang 2012 [58]     | liver      | insulin      | no insulin         | both   | 2.15 / 1.84 / 1.94         | 1.74 / 1.48 / 1.54      | 2.66 / 2.30 / 2.44  | cumulative dose (low/intermediate/high)  |
| Chang 2012 [58]     | liver      | insulin      | no insulin         | both   | 1.96 / 2.90 / 2.79         | 1.68 / 1.68 / 1.58      | 2.28 / 4.99 / 4.92  | cumulative duration (<1/1-2/2+ years)    |
| Cleveland 2012 [59] | breast     | insulin      | no insulin         | women  | 1.15                       | 0.40                    | 3.40                | 0.00                                     |
| Fortuny 2005 [60]   | lymphoma   | insulin      | no insulin         | both   | 0.73 / 0.36                | 0.23 / 0.07             | 2.33 / 1.79         | length use (1-9/9+ years)                |
| Kawaguchi 2010 [61] | hcc        | Insulin      | No insulin         | both   | 2.97                       | 1.29                    | 6.82                | 0.00                                     |
| Koro 2007 [62]      | colon      | insulin only | thiazolidinediones | both   | 4.46                       | 1.05                    | 19.00               | 0.00                                     |
| Koro 2007 [62]      | colon      | insulin only | thiazolidinediones | both   | 1.25                       | 0.68                    | 2.32                | 0.00                                     |
| Koro 2007 [62]      | prostate   | insulin only | thiazolidinediones | men    | 1.80                       | 0.79                    | 4.07                | 0.00                                     |
| Koro 2007 [62]      | prostate   | insulin only | thiazolidinediones | men    | 1.09                       | 0.61                    | 1.95                | 0.00                                     |
| Koro 2007 [62]      | breast     | insulin only | thiazolidinediones | women  | 1.27                       | 0.61                    | 2.67                | 0.00                                     |
| Koro 2007 [62]      | breast     | insulin only | thiazolidinediones | women  | 1.00                       | 0.56                    | 1.77                | 0.00                                     |
| Li 2011 [63]        | pancreatic | insulin      | no insulin         | both   | 2.20                       | 1.60                    | 3.00                | 0.00                                     |
| Li 2011 [63]        | pancreatic | insulin      | no insulin         | both   | 2.4 / 1.2 / 0.5            | 1.6 / 0.7 / 0.3         | 3.7 / 1.9 / 0.9     | length of use (≤3/3-9/10+ years)         |
| Mizuno 2013 [64]    | pancreatic | Insulin      | No insulin         | both   | 3.52                       | 1.00                    | 14.87               | 0.00                                     |
| Mizuno 2013 [64]    | pancreatic | Insulin      | No insulin         | both   | 4.77 / 2.47                | 1.09 / 0.71             | 22.34 / 9.91        | length of use (<5/5+ years)              |
| Mizuno 2013 [64]    | pancreatic | Insulin      | No insulin         | both   | 3.50 / 2.63                | 0.89 / 0.72             | 15.15 / 10.81       | cumulative dose (<30/30+ U/day)          |
| Vinikoor 2009 [65]  | rectal     | insulin      | no insulin         | both   | 1.74                       | 0.92                    | 3.31                | 0.00                                     |
| Vinikoor 2009 [65]  | rectal     | insulin      | no insulin         | both   | 2.11                       | 1.05                    | 4.23                | 0.00                                     |
| Vinikoor 2009 [65]  | rectal     | insulin      | no insulin         | both   | 2.53                       | 1.21                    | 5.28                | 0.00                                     |
| Yang 2004 [66]      | colorectal | insulin      | no insulin         | both   | 1.4 / 2.9 / 4.7            | 0.6 / 1.1 / 1.3         | 2.9 / 7.7 / 16.7    | cumulative duration (1-<3/3-<5/5+ years) |
| Yang 2004 [66]      | colorectal | insulin      | no insulin         | both   | 1.21                       | 1.03                    | 1.42                | incremental duration (1-year increment)  |

## Supplementary Material 4: (Tables 1-14)

Presents estimates by 14 cancer sites examined in more than one study, sorted by type of exposure-comparator contrast (e.g. insulin vs. no insulin) and name of exposure. Only one risk estimate for each combination of cancer site and exposure contrast is included (chosen according to algorithm presented in article). These are the estimates preferred for inclusion in the pooled analyses, but note that pooled analyses were actually only performed for the 3 most frequently used exposure contrasts that were studied in several populations. See Supplementary Material 5 for cancer sites only examined in one study.

*Abbreviations:* ad, antidiabetic drug; excl, excluding; exp, exposure; Int-, intermediate-acting; ne, not estimable; niad, non-insulin antidiabetic drugs; oad, oral antidiabetic drug;

### 1) Any cancer (with or without exclusion of non-melanoma skin cancer)

| Author<br>(country)                          | Exposure                  | Comparator                        | Gender | Risk | [95% CI]      |
|----------------------------------------------|---------------------------|-----------------------------------|--------|------|---------------|
| <b><i>Insulin vs. no insulin:</i></b>        |                           |                                   |        |      |               |
| Yang 2010 [51]                               | insulin                   | no insulin                        | both   | 0.17 | [0.09 , 0.32] |
| Carstensen 2012 [27]                         | insulin                   | no insulin                        | men    | 1.14 | [1.08 , 1.20] |
| Carstensen 2013 [27]                         | insulin                   | no insulin                        | women  | 1.23 | [1.16 , 1.30] |
| Chang 2012 [58]                              | insulin                   | no insulin                        | both   | 1.97 | [1.85 , 2.09] |
| <b><i>Insulin vs. niad:</i></b>              |                           |                                   |        |      |               |
| Currie 2009 [30]                             | insulin                   | metformin only                    | both   | 1.35 | [1.19 , 1.54] |
| Hsieh 2012 [35]                              | insulin only              | metformin only                    | both   | 1.78 | [1.41 , 2.26] |
| <b><i>Insulin A vs. B:</i></b>               |                           |                                   |        |      |               |
| Currie 2009 [30]                             | analog biphasic           | glargine only                     | both   | 1.02 | [0.76 , 1.37] |
| Fagot 2012 [31]                              | detemir                   | other int- / long-acting insulins | both   | 1.01 | [0.89 , 1.13] |
| Ruiter 2012 [47]                             | glargine                  | human                             | both   | 0.77 | [0.73 , 0.82] |
| Chang 2011 [28]                              | glargine                  | human int- / long-acting          | both   | 0.86 | [0.73 , 1.02] |
| Fagot 2012 [31]                              | glargine                  | other int- / long-acting insulins | both   | 1.04 | [0.93 , 1.16] |
| Blin 2012 [25]                               | glargine only             | human only                        | both   | 0.59 | [0.28 , 1.25] |
| Colhoun 2010 [29]                            | glargine only             | non-glargine insulins only        | both   | 1.64 | [1.05 , 2.54] |
| Morden 2011 [42]                             | glargine only             | non-glargine insulins only        | both   | 0.94 | [0.88 , 1.01] |
| Ljung 2011 [41]                              | glargine only             | non-glargine insulins only        | both   | 1.10 | [0.96 , 1.26] |
| Currie 2009 [30]                             | human biphasic            | glargine only                     | both   | 0.88 | [0.66 , 1.19] |
| Fagot 2012 [31]                              | human int- / long-acting  | other int- / long-acting insulins | both   | 0.91 | [0.76 , 1.08] |
| Currie 2009 [30]                             | human long-acting only    | glargine only                     | both   | 1.24 | [0.90 , 1.70] |
| Ruiter 2012 [47]                             | non-glargine analogs only | human                             | both   | 0.85 | [0.82 , 0.88] |
| <b><i>Insulin A vs. B or no insulin:</i></b> |                           |                                   |        |      |               |
| Hense 2011 [34]                              | insulin analogs           | no use insulin analogs            | both   | 0.89 | [0.79 , 1.01] |
| Hense 2011 [34]                              | human only                | no use human insulin              | both   | 1.25 | [1.17 , 1.33] |

## 2) Breast cancer

| Author (country)                             | Exposure                  | Comparator                        | Gender | Risk | [95% CI]      |
|----------------------------------------------|---------------------------|-----------------------------------|--------|------|---------------|
| <b><i>Insulin vs. no insulin:</i></b>        |                           |                                   |        |      |               |
| Neumann 2012 [43]                            | insulin                   | no insulin                        | women  | 0.86 | [0.81, 0.91]  |
| Carstensen 2013 [27]                         | insulin                   | no insulin                        | men    | 2.59 | [0.84, 7.94]  |
| Carstensen 2013 [27]                         | insulin                   | no insulin                        | women  | 0.96 | [0.84, 1.09]  |
| Ferrara 2011 [32]                            | insulin                   | no insulin                        | women  | 1.00 | [0.90, 1.20]  |
| Chang 2012 [58]                              | insulin                   | no insulin                        | both?  | 0.93 | [0.69, 1.25]  |
| Cleveland 2012 [59]                          | insulin                   | no insulin                        | women  | 1.15 | [0.40, 3.40]  |
| Redaniel 2012 [46]                           | insulin only              | no ad drugs                       | women  | 0.72 | [0.60, 0.87]  |
| <b><i>Insulin vs. niad:</i></b>              |                           |                                   |        |      |               |
| Currie 2009 [30]                             | insulin                   | metformin only                    | women  | 1.07 | [0.79, 1.44]  |
| Koro 2007 [62]                               | insulin only              | thiazolidinediones                | women  | 1.27 | [0.61, 2.67]  |
| Hsieh 2012 [35]                              | insulin only              | metformin only                    | women  | 1.63 | [0.60, 4.40]  |
| Redaniel 2012 [46]                           | insulin only              | sulfonylurea only                 | women  | 1.14 | [0.54, 2.39]  |
| <b><i>Insulin A vs. B:</i></b>               |                           |                                   |        |      |               |
| Kostev 2012 [36]                             | detemir                   | nph insulin                       | women  | 1.17 | [0.66, 2.06]  |
| Fagot 2012 [31]                              | detemir                   | other int- / long-acting insulins | women  | 1.08 | [0.72, 1.62]  |
| Ruiter 2012 [47]                             | glargine                  | human                             | women  | 1.39 | [1.08, 1.79]  |
| Chang 2011 [28]                              | glargine                  | human int- / long-acting          | women  | 0.53 | [0.21, 1.31]  |
| Suissa 2012 [48]                             | glargine                  | non-glargine insulins only        | women  | 0.80 | [0.30, 2.10]  |
| Kostev 2012 [36]                             | glargine                  | nph insulin                       | women  | 0.93 | [0.68, 1.27]  |
| Fagot 2012 [31]                              | glargine                  | other int- / long-acting insulins | women  | 1.08 | [0.72, 1.62]  |
| Currie 2009 [30]                             | glargine only             | non-glargine insulin              | women  | 0.86 | [0.42, 1.75]  |
| Colhoun 2010 [29]                            | glargine only             | non-glargine insulins only        | women  | 3.65 | [1.05, 12.68] |
| Morden 2011 [42]                             | glargine only             | non-glargine insulins only        | women  | 1.03 | [0.83, 1.29]  |
| Ljung 2011 [41]                              | glargine only             | non-glargine insulins only        | women  | 1.58 | [1.09, 2.29]  |
| Fagot 2012 [31]                              | human int- / long-acting  | other int- / long-acting insulins | women  | 1.03 | [0.56, 1.88]  |
| Ruiter 2012 [47]                             | non-glargine analogs only | human                             | women  | 1.00 | [0.93, 1.09]  |
| <b><i>Insulin A vs. B or no insulin:</i></b> |                           |                                   |        |      |               |
| Lind 2012 [40]                               | glargine                  | no glargine                       | women  | 1.54 | [0.90, 2.67]  |

## 3) Prostate cancer

| Author (country)                             | Exposure                  | Comparator                        | Gender | Risk | [95% CI]     |
|----------------------------------------------|---------------------------|-----------------------------------|--------|------|--------------|
| <b><i>Insulin vs. no insulin:</i></b>        |                           |                                   |        |      |              |
| Carstensen 2013 [27]                         | insulin                   | no insulin                        | men    | 0.79 | [0.69, 0.90] |
| Ferrara 2011 [32]                            | insulin                   | no insulin                        | men    | 0.80 | [0.70, 0.90] |
| Chang 2012 [58]                              | insulin                   | no insulin                        | men    | 0.88 | [0.64, 1.20] |
| <b><i>Insulin vs. niad:</i></b>              |                           |                                   |        |      |              |
| Currie 2009 [30]                             | insulin                   | metformin only                    | men    | 1.10 | [0.79, 1.52] |
| Koro 2007 [62]                               | insulin only              | thiazolidinediones                | men    | 1.80 | [0.79, 4.07] |
| Hsieh 2012 [35]                              | insulin only              | metformin only                    | men    | 0.89 | [0.34, 2.36] |
| <b><i>Insulin A vs. B:</i></b>               |                           |                                   |        |      |              |
| Ruiter 2012 [47]                             | glargine                  | human                             | men    | 1.17 | [0.84, 1.62] |
| Chang 2011 [28]                              | glargine                  | human int- / long-acting          | men    | 2.37 | [0.94, 6.01] |
| Fagot 2012 [31]                              | glargine                  | other int- / long-acting insulins | men    | 1.01 | [0.68, 1.48] |
| Colhoun 2010 [29]                            | glargine only             | non-glargine insulins only        | men    | 1.16 | [0.16, 8.50] |
| Morden 2011 [42]                             | glargine only             | non-glargine insulins only        | men    | 1.12 | [0.88, 1.42] |
| Ljung 2011 [41]                              | glargine only             | non-glargine insulins only        | men    | 1.11 | [0.81, 1.52] |
| Ruiter 2012 [47]                             | non-glargine analogs only | human                             | men    | 0.82 | [0.69, 0.97] |
| <b><i>Insulin A vs. B or no insulin:</i></b> |                           |                                   |        |      |              |
| Lind 2012 [40]                               | glargine                  | no glargine                       | men    | 1.37 | [0.78, 2.39] |



## 4) Stomach cancer

| Author (country)                      | Exposure     | Comparator               | Gender | Risk | [95% CI]      |
|---------------------------------------|--------------|--------------------------|--------|------|---------------|
| <b><i>Insulin vs. no insulin:</i></b> |              |                          |        |      |               |
| Carstensen 2013 [27]                  | insulin      | no insulin               | men    | 1.23 | [0.90 , 1.68] |
| Carstensen 2013 [27]                  | insulin      | no insulin               | women  | 1.43 | [0.89 , 2.28] |
| Chang 2012 [58]                       | insulin      | no insulin               | both   | 2.46 | [1.91 , 3.17] |
| <b><i>Insulin vs. niad:</i></b>       |              |                          |        |      |               |
| Hsieh 2012 [35]                       | insulin only | metformin only           | both   | 1.86 | [0.78 , 4.42] |
| <b><i>Insulin A vs. B:</i></b>        |              |                          |        |      |               |
| Chang 2011 [28]                       | glargine     | human int- / long-acting | both   | 0.62 | [0.27 , 1.42] |

## 5) Pancreatic cancer

| Author (country)                      | Exposure      | Comparator                 | Gender | Risk | [95% CI]       |
|---------------------------------------|---------------|----------------------------|--------|------|----------------|
| <b><i>Insulin vs. no insulin:</i></b> |               |                            |        |      |                |
| Lai 2012 [37]                         | insulin       | no insulin                 | both   | 2.20 | [1.40 , 3.45]  |
| Carstensen 2013 [27]                  | insulin       | no insulin                 | men    | 2.92 | [2.49 , 3.42]  |
| Carstensen 2013 [27]                  | insulin       | no insulin                 | women  | 3.30 | [2.77 , 3.93]  |
| Ferrara 2011 [32]                     | insulin       | no insulin                 | both   | 3.10 | [2.40 , 4.00]  |
| Chang 2012 [58]                       | insulin       | no insulin                 | both   | 3.75 | [2.61 , 5.38]  |
| Li 2011 [63]                          | insulin       | no insulin                 | both   | 2.20 | [1.60 , 3.00]  |
| Mizuno 2013 [64]                      | Insulin       | No insulin                 | both   | 3.52 | [1.00 , 14.87] |
| Oliveria 2008 [45]                    | insulin only  | no insulin                 | both   | 0.64 | [0.34 , 1.21]  |
| <b><i>Insulin vs. niad:</i></b>       |               |                            |        |      |                |
| Currie 2009 [30]                      | insulin       | metformin only             | both   | 4.63 | [2.64 , 8.10]  |
| Bonelli 2003 [56]                     | insulin       | oad                        | both   | 7.68 | [1.67 , 35.40] |
| Hsieh 2012 [35]                       | insulin only  | metformin only             | both   | 0.69 | [0.09 , 5.55]  |
| <b><i>Insulin A vs. B:</i></b>        |               |                            |        |      |                |
| Chang 2011 [28]                       | glargine      | human int- / long-acting   | both   | 1.85 | [1.06 , 3.22]  |
| Morden 2011 [42]                      | glargine only | non-glargine insulins only | both   | 0.95 | [0.67 , 1.35]  |
| Ljung 2011 [41]                       | glargine only | non-glargine insulins only | both   | 1.52 | [0.82 , 2.83]  |

## 6) Liver cancer

| Author (country)                             | Exposure           | Comparator                        | Gender | Risk | [95% CI]      |
|----------------------------------------------|--------------------|-----------------------------------|--------|------|---------------|
| <b><i>Insulin vs. no insulin:</i></b>        |                    |                                   |        |      |               |
| Lai 2012 [39]                                | insulin            | no insulin                        | both   | 0.98 | [0.74 , 1.28] |
| Carstensen 2013 [27]                         | insulin            | no insulin                        | men    | 2.41 | [1.93 , 3.00] |
| Carstensen 2013 [27]                         | insulin            | no insulin                        | women  | 2.59 | [1.58 , 4.23] |
| Chang 2012 [58]                              | insulin            | no insulin                        | both   | 1.98 | [1.71 , 2.31] |
| Kawaguchi 2010 [61]                          | Insulin            | No insulin                        | both   | 2.97 | [1.29 , 6.82] |
| Oliveria 2008 [45]                           | insulin only       | no insulin                        | both   | 1.19 | [0.54 , 2.65] |
| <b><i>Insulin vs. niad:</i></b>              |                    |                                   |        |      |               |
| Hsieh 2012 [35]                              | insulin only       | metformin only                    | both   | 1.82 | [1.08 , 3.08] |
| <b><i>Insulin A vs. B:</i></b>               |                    |                                   |        |      |               |
| Chang 2011 [28]                              | glargine           | human int- / long-acting          | both   | 0.76 | [0.54 , 1.08] |
| Fagot 2012 [31]                              | glargine           | other int- / long-acting insulins | both   | 1.07 | [0.72 , 1.59] |
| <b><i>Insulin A vs. B or no insulin:</i></b> |                    |                                   |        |      |               |
| Chang 2012 [57]                              | human short-acting | no use human short-acting         | both   | 2.35 | [2.21 , 2.49] |

## 7) Colorectal cancer

| Author (country)                             | Exposure           | Comparator                        | Gender | Risk | [95% CI]      |
|----------------------------------------------|--------------------|-----------------------------------|--------|------|---------------|
| <b><i>Insulin vs. no insulin:</i></b>        |                    |                                   |        |      |               |
| Campbell 2010 [26]                           | insulin            | no insulin                        | men    | 1.11 | [0.82 , 1.51] |
| Campbell 2010 [26]                           | insulin            | no insulin                        | women  | 0.94 | [0.60 , 1.48] |
| Neumann 2012 [43]                            | insulin            | no insulin                        | both   | 1.05 | [1.01 , 1.11] |
| Carstensen 2013 [27]                         | insulin            | no insulin                        | men    | 0.99 | [0.86 , 1.14] |
| Carstensen 2013 [27]                         | insulin            | no insulin                        | women  | 0.90 | [0.75 , 1.09] |
| Chang 2012 [58]                              | insulin            | no insulin                        | both   | 2.67 | [2.29 , 3.12] |
| Oliveria 2008 [45]                           | insulin only       | no insulin                        | both   | 0.99 | [0.74 , 1.33] |
| <b><i>Insulin vs. niad:</i></b>              |                    |                                   |        |      |               |
| Currie 2009 [30]                             | insulin            | metformin only                    | both   | 1.69 | [1.23 , 2.33] |
| Hsieh 2012 [35]                              | insulin only       | metformin only                    | both   | 2.14 | [1.23 , 3.72] |
| <b><i>Insulin A vs. B:</i></b>               |                    |                                   |        |      |               |
| Chang 2011 [28]                              | glargine           | human int- / long-acting          | both   | 0.78 | [0.49 , 1.26] |
| Fagot 2012 [31]                              | glargine           | other int- / long-acting insulins | both   | 0.98 | [0.72 , 1.32] |
| Colhoun 2010 [29]                            | glargine only      | non-glargine insulins only        | both   | 1.43 | [0.45 , 4.57] |
| Ljung 2011 [41]                              | glargine only      | non-glargine insulins only        | both   | 0.88 | [0.61 , 1.28] |
| <b><i>Insulin A vs. B or no insulin:</i></b> |                    |                                   |        |      |               |
| Chang 2012 [57]                              | human short-acting | no use human short-acting         | both   | 2.56 | [2.40 , 2.72] |

## 8) Colon cancer

| Author (country)                      | Exposure                  | Comparator                 | Gender | Risk | [95% CI]       |
|---------------------------------------|---------------------------|----------------------------|--------|------|----------------|
| <b><i>Insulin vs. no insulin:</i></b> |                           |                            |        |      |                |
| Campbell 2010 [26]                    | insulin                   | no insulin                 | men    | 1.13 | [0.79 , 1.61]  |
| Campbell 2010 [26]                    | insulin                   | no insulin                 | women  | 1.04 | [0.62 , 1.73]  |
| Carstensen 2013 [27]                  | insulin                   | no insulin                 | men    | 1.00 | [0.84 , 1.19]  |
| Carstensen 2013 [27]                  | insulin                   | no insulin                 | women  | 0.90 | [0.73 , 1.12]  |
| Ferrara 2011 [32]                     | insulin                   | no insulin                 | both   | 1.10 | [0.90 , 1.30]  |
| <b><i>Insulin vs. niad:</i></b>       |                           |                            |        |      |                |
| Koro 2007 [62]                        | insulin only              | thiazolidinediones         | both   | 4.46 | [1.05 , 19.00] |
| <b><i>Insulin A vs. B:</i></b>        |                           |                            |        |      |                |
| Ruiter 2012 [47]                      | glargine                  | human                      | both   | 0.61 | [0.43 , 0.88]  |
| Morden 2011 [42]                      | glargine only             | non-glargine insulins only | both   | 0.79 | [0.60 , 1.05]  |
| Ruiter 2012 [47]                      | non-glargine analogs only | human                      | both   | 0.87 | [0.78 , 0.97]  |

## 9) Rectal cancer

| Author (country)                      | Exposure | Comparator | Gender | Risk | [95% CI]      |
|---------------------------------------|----------|------------|--------|------|---------------|
| <b><i>Insulin vs. no insulin:</i></b> |          |            |        |      |               |
| Campbell 2010 [26]                    | insulin  | no insulin | men    | 1.05 | [0.58 , 1.90] |
| Campbell 2010 [26]                    | insulin  | no insulin | women  | 0.65 | [0.24 , 1.75] |
| Carstensen 2013 [27]                  | insulin  | no insulin | men    | 0.98 | [0.77 , 1.24] |
| Carstensen 2013 [27]                  | insulin  | no insulin | women  | 0.91 | [0.62 , 1.32] |
| Ferrara 2011 [32]                     | insulin  | no insulin | both   | 1.00 | [0.70 , 1.40] |
| Vinikoor 2009 [65]                    | insulin  | no insulin | both   | 1.74 | [0.92 , 3.31] |

## 10) Respiratory cancer

| Author (country)                             | Exposure                  | Comparator                        | Gender | Risk | [95% CI]      |
|----------------------------------------------|---------------------------|-----------------------------------|--------|------|---------------|
| <b><i>Insulin vs. no insulin:</i></b>        |                           |                                   |        |      |               |
| Lai 2012 [38]                                | insulin                   | no insulin                        | both   | 1.00 | [0.68 , 1.45] |
| Neumann 2012 [43]                            | insulin                   | no insulin                        | both   | 1.23 | [1.17 , 1.29] |
| Carstensen 2013 [27]                         | insulin                   | no insulin                        | men    | 1.28 | [1.13 , 1.45] |
| Carstensen 2013 [27]                         | insulin                   | no insulin                        | women  | 1.31 | [1.11 , 1.54] |
| Ferrara 2011 [32]                            | insulin                   | no insulin                        | both   | 1.10 | [0.90 , 1.30] |
| Chang 2012 [58]                              | insulin                   | no insulin                        | both   | 1.86 | [1.56 , 2.23] |
| <b><i>Insulin vs. niad:</i></b>              |                           |                                   |        |      |               |
| Hsieh 2012 [35]                              | insulin only              | metformin only                    | both   | 1.06 | [0.51 , 2.18] |
| <b><i>Insulin A vs. B:</i></b>               |                           |                                   |        |      |               |
| Ruiter 2012 [47]                             | glargine                  | human                             | both   | 0.92 | [0.74 , 1.16] |
| Chang 2011 [28]                              | glargine                  | human int- / long-acting          | both   | 1.01 | [0.59 , 1.71] |
| Fagot 2012 [31]                              | glargine                  | other int- / long-acting insulins | both   | 1.10 | [0.78 , 1.57] |
| Colhoun 2010 [29]                            | glargine only             | non-glargine insulins only        | both   | 1.43 | [0.53 , 3.88] |
| Ruiter 2012 [47]                             | non-glargine analogs only | human                             | both   | 0.70 | [0.62 , 0.78] |
| <b><i>Insulin A vs. B or no insulin:</i></b> |                           |                                   |        |      |               |
| Chang 2012 [57]                              | human short-acting        | no use human short-acting         | both   | 1.90 | [1.76 , 2.03] |

## 11) Bladder cancer

| Author (country)                             | Exposure                  | Comparator                        | Gender | Risk | [95% CI]      |
|----------------------------------------------|---------------------------|-----------------------------------|--------|------|---------------|
| <b><i>Insulin vs. no insulin:</i></b>        |                           |                                   |        |      |               |
| Neumann 2012 [43]                            | insulin                   | no insulin                        | both   | 1.08 | [0.97 , 1.21] |
| Carstensen 2013 [27]                         | insulin                   | no insulin                        | men    | 0.91 | [0.75 , 1.10] |
| Carstensen 2013 [27]                         | insulin                   | no insulin                        | women  | 1.13 | [0.77 , 1.64] |
| Newton 2012 [44]                             | insulin                   | no insulin                        | both   | 1.70 | [1.13 , 2.54] |
| Oliveria 2008 [45]                           | insulin only              | no insulin                        | both   | 1.09 | [0.72 , 1.64] |
| <b><i>Insulin A vs. B:</i></b>               |                           |                                   |        |      |               |
| Ruiter 2012 [47]                             | glargine                  | human                             | both   | 1.77 | [1.04 , 3.00] |
| Fagot 2012 [31]                              | glargine                  | other int- / long-acting insulins | both   | 1.06 | [0.67 , 1.66] |
| Ruiter 2012 [47]                             | non-glargine analogs only | human                             | both   | 0.69 | [0.57 , 0.84] |
| <b><i>Insulin A vs. B or no insulin:</i></b> |                           |                                   |        |      |               |
| Chang 2012 [57]                              | human short-acting        | no use human short-acting         | both   | 1.11 | [0.96 , 1.28] |

## 12) Kidney cancer

| Author (country)                      | Exposure | Comparator                        | Gender | Risk | [95% CI]      |
|---------------------------------------|----------|-----------------------------------|--------|------|---------------|
| <b><i>Insulin vs. no insulin:</i></b> |          |                                   |        |      |               |
| Neumann 2012 [43]                     | insulin  | no insulin                        | both   | 1.09 | [1.00 , 1.20] |
| Carstensen 2013 [27]                  | insulin  | no insulin                        | men    | 1.39 | [1.06 , 1.83] |
| Carstensen 2013 [27]                  | insulin  | no insulin                        | women  | 2.04 | [1.45 , 2.86] |
| Ferrara 2011 [32]                     | insulin  | no insulin                        | both   | 1.30 | [0.90 , 1.70] |
| <b><i>Insulin A vs. B:</i></b>        |          |                                   |        |      |               |
| Fagot 2012 [31]                       | glargine | other int- / long-acting insulins | both   | 1.11 | [0.54 , 2.26] |

## 13) Melanoma

| Author (country)               | Exposure | Comparator | Gender | Risk | [95% CI]     |
|--------------------------------|----------|------------|--------|------|--------------|
| <i>Insulin vs. no insulin:</i> |          |            |        |      |              |
| Carstensen 2013 [27]           | insulin  | no insulin | men    | 0.80 | [0.57, 1.12] |
| Carstensen 2013 [27]           | insulin  | no insulin | women  | 1.10 | [0.76, 1.60] |
| Ferrara 2011 [32]              | insulin  | no insulin | both   | 1.10 | [0.80, 1.50] |

## 14) Non-Hodgkin's lymphoma (NHL)

| Author (country)               | Exposure | Comparator | Gender | Risk | [95% CI]     |
|--------------------------------|----------|------------|--------|------|--------------|
| <i>Insulin vs. no insulin:</i> |          |            |        |      |              |
| Carstensen 2013 [27]           | insulin  | no insulin | men    | 0.85 | [0.60, 1.19] |
| Carstensen 2013 [27]           | insulin  | no insulin | women  | 1.18 | [0.81, 1.73] |
| Tseng 2012 [49]                | insulin  | no insulin | both   | 2.52 | [1.37, 4.64] |
| Ferrara 2011 [32]              | insulin  | no insulin | both   | 1.00 | [0.80, 1.30] |

## Supplementary Material 5

Presents results for the cancer sites that were only examined in one study per exposure contrast, i.e. no pooled analyses could be performed for these cancer sites.

In addition to these cancer sites, lymphoma was examined in only one study and risk by strata of duration of exposure is presented in Appendix 6 (Fortuny 2005 [60]).

*Abbreviations:* HL, Hodgkin's lymphoma; Int-, intermediate-acting;

| Author (country)     | Outcome              | Exposure      | Comparator                        | Gender | Risk | [95% CI]     |
|----------------------|----------------------|---------------|-----------------------------------|--------|------|--------------|
| Carstensen 2013 [27] | leukaemia            | insulin       | no insulin                        | men    | 1.01 | [0.72, 1.43] |
| Carstensen 2013 [27] | leukaemia            | insulin       | no insulin                        | women  | 1.08 | [0.70, 1.66] |
| Carstensen 2013 [27] | HL                   | insulin       | no insulin                        | men    | 1.07 | [0.50, 2.29] |
| Carstensen 2013 [27] | HL                   | insulin       | no insulin                        | women  | 0.52 | [0.12, 2.22] |
| Carstensen 2013 [27] | multiple myeloma     | insulin       | no insulin                        | men    | 0.92 | [0.57, 1.49] |
| Carstensen 2013 [27] | multiple myeloma     | insulin       | no insulin                        | women  | 0.74 | [0.36, 1.52] |
| Carstensen 2013 [27] | brain                | insulin       | no insulin                        | men    | 1.00 | [0.69, 1.44] |
| Carstensen 2013 [27] | brain                | insulin       | no insulin                        | women  | 1.47 | [1.00, 2.18] |
| Neumann 2012 [43]    | head+neck            | insulin       | no insulin                        | both   | 1.24 | [1.14, 1.36] |
| Fagot 2012 [31]      | head+neck            | glargine      | other int- / long-acting insulins | both   | 0.91 | [0.48, 1.72] |
| Chang 2011 [28]      | skin                 | glargine      | human int- / long-acting          | both   | 1.08 | [0.48, 2.46] |
| Carstensen 2013 [27] | testis               | insulin       | no insulin                        | men    | 0.57 | [0.25, 1.28] |
| Carstensen 2013 [27] | ovarian              | insulin       | no insulin                        | women  | 1.07 | [0.76, 1.50] |
| Carstensen 2013 [27] | uterus               | insulin       | no insulin                        | women  | 1.05 | [0.82, 1.36] |
| Ferrara 2011 [32]    | uterus               | insulin       | no insulin                        | women  | 1.00 | [0.80, 1.30] |
| Carstensen 2013 [27] | cervical             | insulin       | no insulin                        | women  | 1.37 | [0.89, 2.09] |
| Carstensen 2013 [27] | thyroid              | insulin       | no insulin                        | men    | 1.38 | [0.57, 3.35] |
| Carstensen 2013 [27] | thyroid              | insulin       | no insulin                        | women  | 2.05 | [1.07, 3.90] |
| Carstensen 2013 [27] | oesophagus           | insulin       | no insulin                        | men    | 0.98 | [0.67, 1.43] |
| Carstensen 2013 [27] | oesophagus           | insulin       | no insulin                        | women  | 1.19 | [0.57, 2.49] |
| Ljung 2011 [41]      | gastrointestinal     | glargine only | non-glargine insulins only        | both   | 0.86 | [0.61, 1.23] |
| Yang 2010 [51]       | digestive+peritoneum | insulin       | no insulin                        | both   | 0.19 | [0.08, 0.46] |

## Supplementary Material 6

Presents estimates for strata of dose or duration of insulin exposure for all cancer sites and exposure contrasts.

*Abbreviations:* ad, antidiabetic drug; excl, excluding; exp, exposure; Int-, intermediate-acting; ne, not estimable; niad, non-insulin antidiabetic drugs; nmsc, non-melanoma skin cancer; rx, prescription.

† Numbers separated by " / " are estimates by different strata of dose or duration. Note that the same study may have several dose and / or duration analyses for the same cancer site and exposure contrast.

| Author (country)   | Outcome <sup>‡</sup> | Exposure                 | Comparator                        | Dose / duration strata <sup>†</sup>                                           | Risk estimates <sup>†</sup>      | 95% Confidence Interval (CI)     |                                  | Gender | diabetes type |
|--------------------|----------------------|--------------------------|-----------------------------------|-------------------------------------------------------------------------------|----------------------------------|----------------------------------|----------------------------------|--------|---------------|
| Chang 2012 [58]    | any                  | insulin                  | no insulin                        | time of use (past / recent / current)                                         | 1.03 / 1.32 / 9.94               | 0.95 / 1.18 / 8.93               | 1.12 / 1.49 / 11.08              | both   | DM2           |
| Chang 2012 [58]    | any                  | insulin                  | no insulin                        | cumulative dose (low / intermediate / high)                                   | 2.23 / 1.93 / 1.73               | 2.05 / 1.77 / 1.57               | 2.43 / 2.11 / 1.90               | both   | DM2           |
| Chang 2012 [58]    | any                  | insulin                  | no insulin                        | cumulative duration (<1 / 1-2 / 2+ years)                                     | 2.00 / 2.00 / 1.53               | 1.88 / 1.59 / 1.21               | 2.12 / 2.51 / 1.93               | both   | DM2           |
| Van Staa 2012 [50] | any excl nmsc        | insulin only             | metformin only                    | duration since start exp (<273 / 274-546 / 547-1001 / 1002-1547 / 1548+ days) | 1.49 / 1.36 / 1.23 / 1.05 / 1.17 | 1.27 / 1.15 / 1.04 / 0.86 / 0.95 | 1.75 / 1.61 / 1.46 / 1.27 / 1.43 | both   | DM2           |
| hemkens 2009 [33]  | any                  | aspartat only            | human only                        | mean daily dose (10 / 30 / 50 IU mean daily dose)                             | 1.00 / 1.02 / 1.04               | 0.82 / 0.85 / 0.87               | 1.21 / 1.22 / 1.24               | both   | Unspecified   |
| hemkens 2009 [33]  | any                  | lispro only              | human only                        | mean daily dose (10 / 30 / 50 IU mean daily dose)                             | 0.99 / 0.98 / 0.98               | 0.82 / 0.83 / 0.83               | 1.19 / 1.16 / 1.16               | both   | Unspecified   |
| hemkens 2009 [33]  | any                  | glargine only            | human only                        | mean daily dose (10 / 30 / 50 IU mean daily dose)                             | 1.09 / 1.19 / 1.31               | 1.00 / 1.10 / 1.20               | 1.19 / 1.30 / 1.42               | both   | Unspecified   |
| Chang 2011 [28]    | any                  | glargine                 | human int- / long-acting          | cumulative dose (<50 / 50-135 / 135-300 / >300 DDD)                           | 0.81 / 0.75 / 0.79 / 1.18        | 0.6 / 0.5 / 0.54 / 0.83          | 1.07 / 1.11 / 1.16 / 1.67        | both   | DM2           |
| Chang 2011 [28]    | any                  | glargine                 | human int- / long-acting          | mean daily dose (<0.5 / ≥0.5 DDD / day)                                       | 0.68 / 1.05                      | 0.52 / 0.84                      | 0.89 / 1.32                      | both   | DM2           |
| Chang 2011 [28]    | any                  | glargine                 | human int- / long-acting          | cumulative duration (<1 / ≥1 year)                                            | 0.83 / 0.91                      | 0.69 / 0.61                      | 1.01 / 1.36                      | both   | DM2           |
| Fagot 2012 [31]    | any                  | glargine                 | other int- / long-acting insulins | cumulative dose (<14000 / 14000-27000 / 27000+ IU)                            | 1.04 / 1.01 / 1.06               | 0.91 / 0.88 / 0.91               | 1.18 / 1.16 / 1.24               | both   | DM2           |
| Fagot 2012 [31]    | any                  | detemir                  | other int- / long-acting insulins | cumulative dose (<14000 / 14000-27000 / 27000+ IU)                            | 1.05 / 0.91 / 1.06               | 0.88 / 0.73 / 0.85               | 1.23 / 1.12 / 1.32               | both   | DM2           |
| Fagot 2012 [31]    | any                  | human int- / long-acting | other int- / long-acting insulins | cumulative dose (<14000 / 14000-27000 / 27000+ IU)                            | 0.93 / 0.89 / 0.89               | 0.73 / 0.65 / 0.63               | 1.18 / 1.21 / 1.24               | both   | DM2           |
| Bodmer 2010 [52]   | breast               | insulin                  | no insulin                        | number of prescriptions (1-9 / 10-29 / 30+ rx)                                | 1.74 / 1.30 / 1.51               | 0.95 / 0.62 / 0.76               | 3.21 / 2.70 / 3.01               | women  | DM2           |
| Redaniel 2012 [46] | breast               | insulin only             | sulfonylurea only                 | duration since start exp (<1 / 1-5 / >5 years)                                | 1.01 / 0.54 / 2.25               | 0.11 / 0.18 / 0.72               | 8.97 / 1.68 / 6.99               | women  | DM2           |
| Fagot 2012 [31]    | breast               | detemir                  | other int- / long-acting insulins | cumulative dose (<14000 / 14000-27000 / 27000+ IU)                            | 1.13 / 1.02 / 1.04               | 0.66 / 0.51 / 0.48               | 1.96 / 2.03 / 2.26               | women  | DM2           |
| Fagot 2012 [31]    | breast               | human int- / long-acting | other int- / long-acting insulins | cumulative dose (<14000 / 14000-27000 / 27000+ IU)                            | 1.21 / 1.51 / -                  | 0.56 / 0.61 / -                  | 2.60 / 3.72 / -                  | women  | DM2           |
| Fagot 2012 [31]    | breast               | glargine                 | other int- / long-acting insulins | cumulative dose (<14000 / 14000-27000 / 27000+ IU)                            | 0.88 / 1.02 / 1.49               | 0.54 / 0.62 / 0.91               | 1.45 / 1.67 / 2.45               | women  | DM2           |
| Suissa 2012 [48]   | breast               | glargine                 | non-glargine insulins only        | duration since start exp (<1 / 1-3 / 3-5 / >5 yrs)                            | 1.0 / 0.9 / 0.8 / ne             | 0.3 / 0.3 / 0.2 / ne             | 3.1 / 2.7 / 3.1 / ne             | women  | DM2           |
| Suissa 2012 [48]   | breast               | glargine                 | non-glargine insulins only        | duration since start exp (<1 / 1-3 / 3-5 / >5 yrs)                            | 0.9 / 1.0 / 0.8 / 1.8            | 0.5 / 0.6 / 0.5 / 0.8            | 1.5 / 1.7 / 1.6 / 4.0            | women  | DM2           |

| Author (country)   | Outcome <sup>‡</sup> | Exposure     | Comparator               | Dose / duration strata <sup>†</sup>                    | Risk estimates <sup>†</sup> | 95% Confidence Interval (CI) | Gender                       | diabetes type |             |
|--------------------|----------------------|--------------|--------------------------|--------------------------------------------------------|-----------------------------|------------------------------|------------------------------|---------------|-------------|
| Chang 2011 [28]    | pancreatic           | glargine     | human int- / long-acting | cumulative dose (<50 / 50-135 / 135-300 / >300 DDD)    | 1.23 / 1.19 / 1.15 / 7.90   | 0.53 / 0.34 / 0.27 / 2.64    | 2.84 / 4.17 / 5.00 / 23.71   | both          | DM2         |
| Chang 2011 [28]    | pancreatic           | glargine     | human int- / long-acting | cumulative duration (<1 / ≥1 year)                     | 1.75 / 2.58                 | 0.98 / 0.50                  | 3.12 / 13.23                 | both          | DM2         |
| Chang 2011 [28]    | pancreatic           | glargine     | human int- / long-acting | mean daily dose (<0.5 / ≥0.5 DDD / day)                | 1.92 / 1.84                 | 0.85 / 0.86                  | 4.32 / 3.95                  | both          | DM2         |
| Li 2011 [63]       | pancreatic           | insulin      | no insulin               | length of use (≤3 / 3-9 / 10+ years)                   | 2.4 / 1.2 / 0.5             | 1.6 / 0.7 / 0.3              | 3.7 / 1.9 / 0.9              | both          | Unspecified |
| Mizuno 2013 [64]   | pancreatic           | Insulin      | No insulin               | length of use (<5 / 5+ years)                          | 4.77 / 2.47                 | 1.09 / 0.71                  | 22.34 / 9.91                 | both          | Unspecified |
| Mizuno 2013 [64]   | pancreatic           | Insulin      | No insulin               | cumulative dose (<30 / 30+ U / day)                    | 3.50 / 2.63                 | 0.89 / 0.72                  | 15.15 / 10.81                | both          | Unspecified |
| Chang 2011 [28]    | prostate             | glargine     | human int- / long-acting | cumulative dose (<50 / 50-135 / 135-300 / >300 DDD)    | 1.88 / 2.06 / 5.37 / 2.16   | 0.30 / 0.29 / 0.71 / 0.33    | 11.63 / 14.7 / 40.85 / 14.10 | men           | DM2         |
| Chang 2011 [28]    | prostate             | glargine     | human int- / long-acting | cumulative duration (<1 / ≥1 year)                     | 2.52 / 1.79                 | 0.87 / 0.26                  | 7.25 / 12.33                 | men           | DM2         |
| Chang 2011 [28]    | prostate             | glargine     | human int- / long-acting | mean daily dose (<0.5 / ≥0.5 DDD / day)                | 2.95 / 1.98                 | 0.83 / 0.47                  | 10.43 / 8.40                 | men           | DM2         |
| Chang 2012 [58]    | liver                | insulin      | no insulin               | time of use (past / recent / current)                  | 1.11 / 1.74 / 10.28         | 0.92 / 1.32 / 7.68           | 1.35 / 2.31 / 13.74          | both          | DM2         |
| Chang 2012 [58]    | liver                | insulin      | no insulin               | cumulative dose (low / intermediate / high)            | 2.15 / 1.84 / 1.94          | 1.74 / 1.48 / 1.54           | 2.66 / 2.30 / 2.44           | both          | DM2         |
| Chang 2012 [58]    | liver                | insulin      | no insulin               | cumulative duration (<1 / 1-2 / 2+ years)              | 1.96 / 2.90 / 2.79          | 1.68 / 1.68 / 1.58           | 2.28 / 4.99 / 4.92           | both          | DM2         |
| Yang 2004 [66]     | colorectal           | insulin      | no insulin               | cumulative duration (1-<3 / 3-<5 / 5+ years)           | 1.4 / 2.9 / 4.7             | 0.6 / 1.1 / 1.3              | 2.9 / 7.7 / 16.7             | both          | DM2         |
| Bodmer 2012 [54]   | colorectal           | Insulin      | no insulin               | number of prescriptions (1-9 / 10-29 / 30-49 / 50+ rx) | 1.11 / 0.64 / 1.07 / 0.90   | 0.75 / 0.44 / 0.73 / 0.63    | 1.64 / 0.95 / 1.57 / 1.28    | both          | Unspecified |
| Oliveria 2008 [45] | colorectal           | insulin only | other ad drug            | time of use (past / current)                           | 1.48 / 1.24                 | 0.58 / 0.57                  | 3.78 / 2.68                  | both          | Unspecified |
| Bodmer 2011 [53]   | ovarian              | insulin      | no insulin               | number of prescriptions (1-9 / 10-29 / 30+ rx)         | 4.67 / 1.17 / 1.46          | 1.07 / 0.43 / 0.54           | 20.42 / 3.14 / 3.98          | women         | Unspecified |
| Bodmer 2012 [55]   | lung                 | Insulin      | no insulin               | number of prescriptions (1-14 / 10-39 / 40+ rx)        | 1.64 / 1.16 / 1.53          | 1.20 / 0.84 / 1.18           | 2.24 / 1.59 / 1.99           | both          | Unspecified |
| Fortuny 2005 [60]  | lymphoma             | insulin      | no insulin               | length use (1-9 / 9+ years)                            | 0.73 / 0.36                 | 0.23 / 0.07                  | 2.33 / 1.79                  | both          | DM2         |

## Supplementary Material 7

List of records excluded because of using same data as one of the records included in the review and study the same cancer site and exposure.

‡ Mannucci study [80] was in final analysis excluded because of ambiguous or insufficient reporting of the comparator group.

| <b>Excluded study</b> | <b>Included study</b> |
|-----------------------|-----------------------|
| Blin 2012 [67]        | Blin 2012 [25]        |
| Li 2009 [68]          | Li 2011 [63]          |
| Silverman 1999 [69]   | Li 2011 [63]          |
| Jonasson 2009 [70]    | Ljung 2011 [41]       |
| Ljung 2012 [71]       | Ljung 2011 [41]       |
| Liao 2012 [72]        | Lai 2012 [37]         |
| Liao 2012 [73]        | Chang 2012 [58]       |
| Monami 2008 [74]      | Mannucci 2010 [80] ‡  |
| Monami 2009 [75]      | Mannucci 2010 [80] ‡  |
